# Supplementary material
Source: publisher site journal article supplement (https://www.dovepress.com/article/288399)
Supplement: Supplementary file 1 [file get_supplementary_file.php]

## Supplementary appendix

**Supplementary to** *“The landscape of emerging randomized clinical trial evidence for COVID-19 disease stages: A systematic review of global trial registries”*

## Appendix 1. COVID-19 randomized clinical trials search strategy

**Supplementary Table 1. Search strategy**

All clinical trial registries were searched for results up to 7 October 2020. Database-specific tools to list all COVID-19 registered trials were used, where available.

| Clinical trial registry                                                     | Search terms                                               | Hits |
|-----------------------------------------------------------------------------|------------------------------------------------------------|------|
| ClinicalTrials.gov                                                          | Database-specific tool to list COVID-19 registered trials. | 3598 |
| International Standard Randomised Controlled Trial Number (ISRCTN) Registry | "novel coronavirus 2019" OR "COVID-19" OR "SARS-CoV-2"     | 152  |
| Chinese Clinical Trial Registry                                             | "novel coronavirus 2019" OR "COVID-19" OR "SARS-CoV-2"     | 753  |
| Clinical Research Information Service - Republic of Korea                   | Database-specific tool to list COVID-19 registered trials. | 6022 |
| European Union (EU) Clinical Trials Register                                | "novel coronavirus 2019" OR "COVID-19" OR "SARS-CoV-2"     | 341  |
| Iranian Registry of Clinical Trials                                         | "novel coronavirus 2019" OR "COVID-19" OR "SARS-CoV-2"     | 374  |
| Japan Primary Registries Network                                            | "novel coronavirus 2019" OR "COVID-19" OR "SARS-CoV-2"     | 62   |
| German Clinical Trials Register                                             | Database-specific tool to list COVID-19 registered trials. | 201  |

**Supplementary Table 2. Eligibility criteria**

|                     |                                                                                              |
|---------------------|----------------------------------------------------------------------------------------------|
| <b>Population</b>   | No restrictions.                                                                             |
| <b>Intervention</b> | Any active interventions for COVID-19.                                                       |
| <b>Comparator</b>   | No restrictions.                                                                             |
| <b>Outcome</b>      | No restrictions.                                                                             |
| <b>Study design</b> | Only randomized clinical trials are eligible for inclusion.                                  |
| <b>Others</b>       | Suspended trials are excluded. Only trials registered in English are eligible for inclusion. |
